1 **Yersiniabactin, Colibactin and Wider Resistome Contribute to Enhanced Virulence and**  
2 **Persistence of KPC-2-Producing *Klebsiella pneumoniae* CG258 in South America**

3 Louise T. Cerdeira<sup>1</sup>, Fernanda Esposito<sup>1</sup>, Margaret M. C. Lam<sup>2</sup>, Kelly L. Wyres<sup>2</sup>, Ryan R. Wick<sup>2</sup>,  
4 Louise M. Judd<sup>2</sup>, Marcos V. Cunha<sup>3</sup>, Terezinha Knöbl<sup>3</sup>, Bruna F. Araújo<sup>4</sup>, Rosineide M. Ribas<sup>4</sup>,  
5 Sebastian Cifuentes<sup>5</sup>, Jesus Tamariz<sup>6</sup>, Maria F. C. Bueno<sup>7</sup>, Gabriela R. Francisco<sup>7</sup>, Doroti O. Garcia<sup>7</sup>,  
6 Gerardo Gonzalez-Rocha<sup>8,9</sup>, Gabriel Gutkind<sup>10</sup>, Kathryn E. Holt<sup>2,11</sup>, Nilton Lincopan<sup>1,12\*</sup>

7  
8 **Author affiliations:**<sup>1</sup>Department of Clinical Analysis, School of Pharmacy, University of São Paulo,  
9 Brazil; <sup>2</sup>Department of Biochemistry and Molecular Biology, Bio21 Molecular Science and  
10 Biotechnology Institute, University of Melbourne, Australia; <sup>3</sup>Faculty of Veterinary Medicine and  
11 Animal Science, University of São Paulo, Brazil; <sup>4</sup>Institute of Biomedical Sciences, Federal  
12 University of Uberlandia, Minas Gerais, Brazil; <sup>5</sup>Centro de Referencia y Diagnóstico Médico (CRD),  
13 Osorno, Chile; <sup>6</sup>University Peruana Cayetano Heredia, Lima, Peru; <sup>7</sup>Centro de Bacteriología, Instituto  
14 Adolfo Lutz, São Paulo, Brazil; <sup>8</sup>Laboratorio de Investigación en Agentes Antibacterianos, Facultad  
15 de Ciencias Biológicas, Universidad de Concepción, Chile; <sup>9</sup>Millennium Nucleus on Interdisciplinary  
16 Approach to Antimicrobial Resistance (MICROB-R), Santiago, Chile; <sup>10</sup>Laboratório de Resistencia  
17 Microbiana, Cátedra de Microbiología, Facultad de Farmacia y Bioquímica, University of Buenos  
18 Aires and CONICET, Buenos Aires, Argentina; <sup>11</sup>London School of Hygiene and Tropical Medicine,  
19 London, United Kingdom; <sup>12</sup>Department of Microbiology, Institute of Biomedical Sciences,  
20 University of São Paulo, Brazil.

21  
22 **\*Correspondence:** Nilton Lincopan, [lincopan@usp.br](mailto:lincopan@usp.br)

23  
24 **Keywords:** *K. pneumoniae*; ST11; ST340; CG258; hvKp; virulence; carbapenemase, KPC-2, KPC-3,  
25 CTX-M; multidrug-resistance; *Galleria mellonella*; Latin America; One Health.

26  
27 **Abbreviations:** CR-hvKp, carbapenem-resistant hypervirulent *Klebsiella pneumoniae*; KPC, *Klebsiella*  
28 *pneumoniae* carbapenemase; CTX, cefotaximase; CG, clonal group; ST, sequence type; QACs, quaternary  
29 ammonium compounds; KL, K-locus; ybt, yersiniabactin; clb, colibactin; ICEKp, integrative conjugative  
30 element *K. pneumoniae*; pLVPK, large virulence plasmid of *K. pneumoniae*; CPS, capsular  
31 polysaccharides; MLST, multilocus sequence typing; YbSTs, yersiniabactin sequence types; CbSTs,  
32 colibactin sequence types; CR-Kp, carbapenem-resistant *K. pneumoniae*; MIC, minimum inhibitory  
33 concentration; ESBL, extended-spectrum beta-lactamase; HM, heavy metal; ML, maximum likelihood;  
34 MDR, multidrug resistance; PDR, pandrug resistance; Inc, incompatibility; IS, insertion sequence; KPZM,  
35 Zn<sup>2+</sup>/Mn<sup>2+</sup>metabolism module; QRDR, quinolone-resistance determining region; PMQR, plasmid-  
36 mediated quinolone resistance.

37 **Abstract**

38 The emergence and dissemination of carbapenem-resistant hypervirulent *Klebsiella*  
39 *pneumoniae* (CR-hvKp) is a worrisome public health issue compromising the treatment and  
40 outcome of infections caused by this pathogen. We performed a detailed virulome and  
41 resistome analysis of representative KPC- and/or CTX-M-producing *K. pneumoniae*  
42 belonging to clonal group (CG) 258 (sequence types ST11, ST258, ST340, ST437),  
43 circulating in Argentina, Brazil, Chile, Colombia and Peru; with further evaluation of the  
44 virulence behavior using the *Galleria mellonella* infection model. Genomic analysis of *K.*  
45 *pneumoniae* strains recovered from the human-animal-environment interface revealed a wide  
46 resistome characterized by the presence of genes and mutations conferring resistance to  
47 human and veterinary antibiotics, quaternary ammonium compounds (QACs) and heavy  
48 metals. Plasmid Inc typing revealed the presence of a wide diversity of replicon types with  
49 IncF, IncN, IncR and Col-like being frequently detected. Moreover, KPC-2-producing *K.*  
50 *pneumoniae* belonging to ST11 (KL-64 and KL-105) and ST340 (KL-15) carried multiple  
51 variants of distinct yersiniabactin siderophore (*ybt*) and/or genotoxic colibactin (*clb*) genes. In  
52 this regard, ICEKp3, ICEKp4 and ICEKp12 were identified in strains belonging to ST11 and  
53 ST340, recovered from Argentina, Brazil, Chile and Colombia; whereas *ybt* 17 and a novel  
54 *ybt* sequence type (YbST346) were identified together with *clb* in ICEKp10 structures from  
55 ST11 and ST258, from Brazil and Colombia, respectively. *K. pneumoniae* ST11  
56 (ICEKp10/YbST346 and ICEKp4/*ybt* 10) strains killed 100% of wax moth larvae, in a similar  
57 way to hypervirulent K1/ST23 strain (*ybt*- and *clb*-negative) carrying the pLVPK-like  
58 plasmid, indicating enhanced virulence. In summary, our results indicate that yersiniabactin,  
59 colibactin and an expanded resistome have contributed to enhanced virulence and persistence  
60 of KPC-2-producing *K. pneumoniae* CG258 in South America. Therefore, active surveillance  
61 of hospital-associated lineages of *K. pneumoniae* should not only focus on clonal origin and  
62 antimicrobial resistance, but also on the virulence factors *ybt* and *clb*.

## 63 INTRODUCTION

64 Carbapenem resistance is a major public health concern worldwide, and currently *Klebsiella*  
65 *pneumoniae* belonging to the clonal group CG258 (which include the sequence types ST11,  
66 ST258, ST340, ST437, and ST512) seem to be the main culprits for the spread of *bla*<sub>KPC</sub>  
67 genes (Bowers et al., 2015; Chen et al., 2014; Holt et al. 2015; Mathers et al., 2015; Paczosa  
68 and Meccas 2016; Wyres and Holt, 2016). This problem has been further exacerbated by the  
69 convergence of KPC-2 production and hypervirulence, resulting in the emergence of  
70 carbapenem-resistant hypervirulent *K. pneumoniae* (CR-hvKp) lineages, particularly in Asian  
71 countries (Chen et al., 2017; Lee et al., 2017; Dong et al., 2018a; 2018b; Du et al., 2018; Gu  
72 et al., 2018; Wang et al., 2018). In these countries hypervirulence has been associated with  
73 the appearance and dissemination of a pLVPK-like plasmid harbouring two capsular  
74 polysaccharides (CPS) upregulator genes (*rmpA* and *rmpA2*) and several siderophore gene  
75 clusters (*iroBCDN*, *iucABCD* and *iutA*) (Struve et al., 2015; Chen et al., 2017; Du et al.,  
76 2018; Gu et al., 2018). However, the acquisition of integrative conjugative elements (ICEKp)  
77 harbouring yersiniabactin siderophore (*ybt*) is also associated with enhanced virulence,  
78 whereas carriage of the genotoxic colibactin (*clb*) genes (in ICEKp10structures) has been  
79 associated with invasive disease and colorectal cancer (Holt et al., 2015; Lam et al., 2018a).

80 Based on gene content variation, genomic investigation has allowed the identification  
81 of 14 different structural ICEKp variants, constituting a novel target that deserves further  
82 analysis for evolutionary and genomic surveillance studies (Wu et al., 2009; Lam et al.,  
83 2018a; Lin et al, 2008). A MLST-style approach based on diversity in eleven *ybt* locus genes  
84 has defined yersiniabactin sequence types (YbSTs) by unique combinations of *ybt* gene  
85 alleles and showed that YbST sequences were clustered into 17 distinct *ybt* lineages (Lam et  
86 al., 2018a). In a similar way, variations in the *clb* locus genes have allowed definition of  
87 colibactin sequence types (CbSTs), whereas phylogenetic analysis of the *clb* locus has

88 revealed three lineages that have each associated with a different *ybt* lineage [i.e., *clb* 1 (*ybt*  
89 12), *clb* 2A (*ybt* 1) and *clb* 2B (*ybt* 17)] within the same overall structure (*ICEKp10*).

90 Virulence in CR-Kp strains has also been associated with the type of capsular  
91 polysaccharide (Cortés et al., 2002; Diago-Navarro et al., 2014; Gomez-Simmonds and  
92 Uhlemann, 2017; Liu et al., 2017). In this regard, over 79 capsule (K) serotypes have been  
93 described in the international K serotyping scheme (Brisse et al., 2004; Pan et al., 2015;  
94 Struve et al., 2015). More recently, diversity of the capsule synthesis locus (K-locus), which  
95 is 10–30 kbp in size, has been used as a novel typing method for genomic surveillance and  
96 epidemiological investigations of this pathogen, and identified 134 distinct K-loci, which are  
97 predictive of K serotype (Wyres et al., 2016).

98 In South American countries, KPC-2-producing *K. pneumoniae* has been circulating  
99 in Colombia, Brazil and Argentina since at least 2005 (Villegas et al., 2006; Pavez et al.,  
100 2009; Gomez et al., 2011), and has more recently been reported in Ecuador, Chile,  
101 Venezuela, Paraguay, Uruguay and Peru (Cifuentes et al., 2012; Zurita et al., 2013; Marquez  
102 et al., 2014; Falco et al., 2016; Gomez et al., 2016; Horna et al., 2017). Although, molecular  
103 epidemiology studies have confirmed predominance of the CG258 among KPC-2-producing  
104 *K. pneumoniae* isolates collected in this region (Andrade et al., 2011; Cejas et al., 2012;  
105 Pereira et al., 2013; Gomez et al., 2016; Barría-Loaiza et al., 2017; Horna et al., 2017), few  
106 studies have focused on virulence determinants in these strains (Andrade et al., 2018; Araújo  
107 et al., 2018). In fact, studies of biofilm formation and identification of a common set of  
108 virulence genes have been restricted to KPC-2-producing *K. pneumoniae* from Brazil,  
109 whereas sporadic identification of hypervirulent *K. pneumoniae* (hvKp) isolates belonging to  
110 K1/ST23 and K19/ST29 have been reported in infected patients from Argentina and Brazil  
111 (Cejas et al., 2014; Coutinho et al., 2014; Moura et al., 2017), and also in non-human  
112 primates from Brazil (Anzai et al., 2017). In this study, using a genomic approach, we have  
113 performed a detailed virulome and resistome analysis of KPC- and CTX-M-producing *K.*

114 *pneumoniae* strains belonging to CG258, recovered from the human-animal-environment  
115 interface in Latin America, with further *in vivo* virulence evaluation using a *Galleria*  
116 *mellonella* infection model.

117

## 118 **METHODS**

### 119 ***K. pneumoniae* strains and genome collection**

120 Laboratory studies included 19 KPC-2- and/or CTX-M-producing *K. pneumoniae* isolates  
121 belonging to CG258 (ST11, ST258, ST340, ST437), representative of local surveillance  
122 studies performed in Brazil, Peru, Chile and Argentina, between 2010 to 2016; recovered  
123 from human, food-producing animals (chicken and swine) and environmental (urban rivers  
124 and urban lake) samples (Oliveira et al., 2014; Martins et al., 2015; Cerdeira et al.,  
125 2016a;2016b; Cerdeira et al., 2017; Horna et al., 2017; Nascimento et al., 2017). *K.*  
126 *pneumoniae* ATCC 13883 and hvKp K1/ST23 A58300 (Coutinho et al., 2014) were used as  
127 control strains. For genome analysis, all publicly available genomes from 36 *K. pneumoniae*  
128 CG258 strains isolated in South America were included, of which 23 were previously  
129 published (Bowers et al., 2015; Araújo et al., 2018; Casella et al., 2018; Dalmolin et al.,  
130 2018; Pitt et al., 2018). For all 55 genomes included in this work, accession numbers are  
131 listed in Table S1.

132

### 133 **Antibiotic susceptibility patterns and hypermucoviscosity phenotypical identification**

134 Resistance phenotypes were determined by Kirby-Bauer method, against 30 different human  
135 and veterinary antibiotics, and the results were interpreted using the Clinical and Laboratory  
136 Standards Institute guidelines (CLSI, 2015; 2017) and The European Committee on  
137 Antimicrobial Susceptibility Testing (EUCAST, 2017). Additionally, minimum inhibitory  
138 concentrations (MICs) for ertapenem, imipenem, meropenem, enrofloxacin, ciprofloxacin,  
139 levofloxacin and polymyxin B, were determined by microdilution or Etest methods (CLSI,

140 [2017; EUCAST, 2017](#)). Production of ESBL and carbapenemase enzymes was confirmed by  
141 growth on CHROMagar ESBL and CHROMagar KPC, respectively.

142 Hypermucoviscosity phenotypes of *K. pneumoniae* isolates were determined by the  
143 string test as previously described ([Moura et al., 2017](#)). Briefly, a positive string test was  
144 defined by the formation of a viscous string > 5 mm in length when a colony was grown on a  
145 blood agar plate at 37 °C overnight and stretched by an inoculation loop.

146

#### 147 **Sequencing of *K. pneumoniae* strains**

148 For 12 *K. pneumoniae* strains, total genomic DNA was extracted using PureLink™ Genomic  
149 DNA Mini Kit according to the Manufacturer's instructions. Library preparation was  
150 performed using the Nextera XT DNA sample preparation kit (Illumina, San Diego, CA).  
151 Sequencing was performed using the Illumina NextSeq platform with paired-end reads  
152 (150bp). Additionally, 10 *K. pneumoniae* isolates selected from the 19 KPC-2 and/or CTX-M  
153 producers ([Table S1](#)) were subjected to further sequencing using a PromethION R9.4.1 flow  
154 cell (Oxford Nanopore Technologies). A 2D MinION library was generated from 1.5 µg  
155 purified genomic DNA using the Nanopore Sequencing Kit (SQK-NSK007). DNA was  
156 repaired (NEBNext FFPE RepairMix), prepared for ligation (NEBNextUltra II End-  
157 Repair/dA-tailing Module) and ligated with adapters (NEB Blunt/TA Ligase Master Mix).

158

#### 159 **Bioinformatic analysis**

160 Forty-one *K. pneumoniae* CG258 genomes with available short-read sequence data (including  
161 genomes obtained in this study and publicly available in the GenBank) were subjected for *de*  
162 *novo* assemblies using Unicycler (v0.4.0) ([Wick et al., 2017](#)). For ten genomes obtained with  
163 Nanopore reads, scaffold bridging was performed, building a high-quality finished genome  
164 sequence. The contigs were annotated by Prokka v1.12 (<https://github.com/tseemann/prokka>).  
165 MLSTs, YbSTs, CbSTs ([Lam et al., 2018a](#); [Diancourt et al., 2005](#)), virulome, resistome and

166 plasmid replicon genes were screened by SRST2 (Inouye et al., 2014), using BIGSdb  
167 (Bialek-Davenet et al., 2014), ARG-Annot (Gupta et al., 2014), and PlasmidFinder (Carattoli  
168 et al., 2014) databases. On the other hand, since 14 of the publicly available genomes (used in  
169 this study) were only available as pre-assembled sequences, Kleborate  
170 (<https://github.com/katholt/Kleborate>) and PlasmidFinder were used to identify MLST,  
171 resistome, virulome and plasmid replicon genes. Kleborate was further used to predict  
172 yersiniabactin ICEKp structures in all 55 genomes.

173 ResFinder 3.0 database was used to confirm resistomes (Zankari et al., 2012), and  
174 while capsule and O-antigen biosynthesis loci were identified using Kaptive (Wick et al.,  
175 2018), heavy metal (HM) and QAC genes were screened using BLASTN against local  
176 HM/QAC and BIGSdb databases.

177 Single nucleotide variants were identified using RedDog v1beta.10.3  
178 (<https://github.com/katholt/RedDog>), with the reference genome of *K.*  
179 *pneumoniae*30660/NJST258\_1 (CP006923) (Bowers et al., 2015). Gubbins v.2.1.0 (Croucher  
180 et al., 2014) was used to identify and exclude recombination imports. Maximum likelihood  
181 (ML) trees were inferred from the recombination-masked alignment by running RaxML  
182 v8.2.9 (Stamatakis et al., 2006) five times, selecting the final tree with the highest likelihood.  
183 To assess branch support, we conducted 100 non-parametric bootstrap replicates using  
184 RAxML.

185

### 186 ***Galleria mellonella* killing assays**

187 In order to evaluate the virulence behavior of KPC-2- and/or CTX-M-15-producing *K.*  
188 *pneumoniae* strains, *in vivo* experiments were carried out using a *Galleria mellonella*  
189 infection model (Junqueira 2012; Insua et al. 2013), with the non-virulent *K. pneumoniae*  
190 strain ATCC 13883 and the clinical hvKp K1/ST23 strain A58300 (Coutinho et al. 2014), as  
191 comparative strains. Fourteen *K. pneumoniae* strains of different lineages of CG258 and



192 origins (i.e., human, animal or environmental), circulating in Latin America, were evaluated.  
193 For each experiment, a control group containing five larvae was inoculated with sterile PBS  
194 in order to discard death due to physical trauma. In all experiments, groups of 250 to 350 mg  
195 *G. mellonella* larvae were inoculated with  $10^6$  CFU, and survival analysis was evaluated  
196 during 96h (Moura et al. 2017). Survival curves were plotted using the Kaplan-Meier method,  
197 and data were analyzed by the Fisher's exact test, with  $P < 0.001$  indicating statistical  
198 significance. The statistical software used was Prism7 (Graph Pad Software, San Diego, CA,  
199 USA). *G. mellonella* larvae that did not demonstrate a response to physical stimulation and  
200 had body melanization were considered dead. All experiments were performed in  
201 independent triplicate assays.

202

## 203 RESULTS

### 204 Antimicrobial resistance profiles, resistome and plasmid populations

205 All 19 *K. pneumoniae* evaluated, *in vitro*, exhibited resistance to multiple antibiotics and  
206 were classified as MDR or PDR phenotypes (Magiorakos et al., 2012) (Table 1). In fact,  
207 resistome analysis revealed the presence of genes conferring resistance to aminoglycosides,  
208 quinolones, sulphonamides, tetracycline, phenicols, fosfomycin and beta-lactam antibiotics  
209 (*bla*<sub>OXA-1</sub>, *bla*<sub>OXA-2</sub>, *bla*<sub>OXA-9</sub>, *bla*<sub>OXA-10</sub>, *bla*<sub>CTX-M-15</sub>, *bla*<sub>SHV-11</sub>, *bla*<sub>SHV-12</sub>, *bla*<sub>LAP-2</sub>, *bla*<sub>TEM-1A</sub>,  
210 *bla*<sub>TEM-1B</sub>, *bla*<sub>TEM-55</sub>) (Figure 1; Table S2). Moreover, point mutations in GyrA (Ser-83-Ile),  
211 GyrB (Asp-466-Glu) and ParC (Ser-80-Ile) were associated with quinolone resistance.  
212 Polymyxin resistance in 5 of the 19 (26%) human and environmental isolates was associated  
213 to *mgrB* mutations (i.e., Gly-28-Cys or Tn3 insertion at position 134) (Table S2).  
214 Additionally, the presence of genes conferring resistance to silver (*sil*), copper (*pco*), arsenic  
215 (*ars*), mercury (*mer*), tellurite (*ter*), and quaternary ammonium compounds (*qacA*, *qacE*,  
216 *qacEΔ1*, *qacL* and *sugE*) supported a wider resistome (Figure 1, Table S2), which could  
217 contribute to the apparent high versatility, persistence and adaptation of CG258 to various



218 ecosystems and hosts (Navon-Venezia et al., 2017; Dong et al., 2018). Notably, the presence  
219 of tellurite resistance has also been associated with hypervirulent clonal groups of *K.*  
220 *pneumoniae* (Passet and Brisse, 2015; Martin et al., 2018).

221 Additional *in silico* analysis of 36 genome sequences obtained from GenBank  
222 confirmed the wider resistome of *K. pneumoniae* strains circulating in Latin America.  
223 However, others CTX-M gene variants, such as *bla*<sub>CTX-M-2</sub>, *bla*<sub>CTX-M-8</sub>, *bla*<sub>CTX-M-9</sub>, *bla*<sub>CTX-M-14</sub>  
224 and *bla*<sub>CTX-M-59</sub> could be identified, as well as the *bla*<sub>KPC-3</sub> carbapenemase gene identified in  
225 two Colombian *K. pneumoniae* strains (Colombia-2009a, Colombia-2009b) alone (Table S2).  
226 Moreover, presence of *armA*, *rmtB*, *rmtD* and *rmtG16S* rRNA methyltransferases encoding  
227 genes, conferring resistance to most aminoglycosides, was confirmed in 6 of the 55 (11%)  
228 analyzed genomes. Worryingly, a third of isolates were predicted to be polymyxin resistant  
229 based on deletions in *mgrB* and/or *pmrB* genes in 20 of the 55 analyzed genomes; whereas  
230 the *mcr-1* gene was identified in a human strain isolated in Brazil (Table S2).

231 Plasmid incompatibility (Inc) typing revealed the presence of a wide diversity of  
232 plasmid replicon types harbored by KPC-2- and/or CTX-M-type-producing *K. pneumoniae*  
233 (Figure 1, Table S2). Among 55 genomes analyzed, IncF, IncN, IncR and Col-like replicons  
234 were over-represented (96.4%, 54.5%, 27.3% and 27.3% respectively), whereas other Inc  
235 types identified were: X3 (*n* = 8), HI1B (*n* = 8), L/M (*n* = 6), U (*n* = 5), Q1 (*n* = 4), P6 (*n* = 3),  
236 A/C2 (*n* = 2), I1 (*n* = 1), I2 (*n* = 1), HI1A (*n* = 1) and X4 (*n* = 1). However, *bla*<sub>KPC</sub> plasmids  
237 belonging to the IncN incompatibility group were identified in 30 of the 55 (54%)  
238 carbapenem-resistant *K. pneumoniae* strains.

239

#### 240 **Virulome, yersiniabactin, colibactin and integrative conjugative elements (ICEs)**

241 Among genomes analysed, lineages belonging to ST11 and ST340 carried multiple variants  
242 of distinct yersiniabactin siderophore (*ybt*) and/or genotoxic colibactin (*clb*) genes from  
243 distinct *ybt/clb* lineages and ICE*Kp* variants. In this regard, we detected *ybt* lineage 9

244 (ICEKp3), *ybt* 10 (ICEKp4) and *ybt* 16 (ICEKp12) in nine *ybt*<sup>+</sup> *K. pneumoniae* strains  
245 belonging to ST11 and ST340, isolated from human samples collected in Argentina, Brazil  
246 and Chile (Figure 2A, Table S3); whereas *ybt* 17 and a novel *ybt* sequence type YbST346,  
247 that does not belong to any of the 17 previously described *ybt* lineages (Lam et al, 2018a),  
248 were identified together with *clb* lineage 2B in ICEKp10 structures, in eight Brazilian *K.*  
249 *pneumoniae* ST11 strains recovered from human and environmental samples (Figure 2B).  
250 ST258 lineages from Colombia harbored the classical ICEKp10 with the *ybt* 17 and *clb* 2B.

251 The alignment between the classical ICEKp10/*ybt* 17 and that of ICEKp10 with the  
252 novel YbST346 shows that the main difference is the insertion sequence ISEc21 (IS110  
253 family) located within the Zn<sup>2+</sup>/Mn<sup>2+</sup> metabolism module (KPZM) (Figure 2B, Table S3).

254 Regarding other virulence determinants, the presence of the aerobactin locus (*iuc*) was  
255 only identified in a human KPC-2-positive *K. pneumoniae* strain ST11 from Brazil (Figure  
256 1).

257

### 258 ***In silico* serotyping, capsule locus (KL) analysis and string test**

259 *In silico* serotyping of 55 genomes analyzed showed a predominance of O4 [K36, K15, K-  
260 non-typeable (NT)], O2v2 (K8, K27, K-NT) and O2v1 (K64) serotypes, which were  
261 associated with ST340 (O4/K15, O4/K-NT), ST437 (O4/K36), ST11 (O2v2/K8, O2v2/27,  
262 O2v2/K-NT, O2v1/K64), and ST258 (O2v2/K-NT) (Figure 1, Table S2). On the other hand,  
263 we investigated the diversity of capsule synthesis loci using full locus information extracted  
264 from whole genome sequences. These results show that K-loci were diverse in human and  
265 environmental *K. pneumoniae* ST11 (i.e., KL-8, KL-27, KL-64, KL-105, KL-107, KL-127),  
266 in this region (Figure 1, Table S2). Interestingly, in *K. pneumoniae* belonging to ST340, KL-  
267 15 was assigned to human and environmental strains collected in Argentina, Peru and Brazil,  
268 respectively; whereas KL-151 was only identified in animal strains from Brazil. On the other  
269 hand, human and environmental *K. pneumoniae* ST437 (from Brazil) were typed as KL-36;

270 whereas KL-106 and KL-107 accounted for strains of ST258, in Brazil and Colombia,  
271 respectively.

272 KL-64/ST11 and KL-105/ST11 showed a high virulence behavior in the *G. mellonella*  
273 model, the latter being identified in clinical samples from Chile and Brazil. In this regard,  
274 KL-64 has been previously associated with strains from invasive *K. pneumoniae* infections  
275 (Follador et al., 2016).

276 The genetic structure of the *cps* synthesis loci across the virulent ST11 (KL-105 and  
277 KL-64) and ST340 (KL-15) was distinct from the K-loci from hvKpK1 (KL-1) and K2 (KL-  
278 2) (Figure 3). In this concern, for these K-loci, a conserved genetic organization at the 5' end  
279 of the *cps* locus was observed from *galF* to *wzc* genes, whereas *wzc-gnd* and *gnd-ugd* regions  
280 were variable. Moreover, while in KL-64 the *gnd-ugd* region is composed of genes involved  
281 in GDP-D-mannose synthesis (*manB* and *manC*) and deoxythymidine diphosphate (dTDP)-L-  
282 rhamnose synthesis (*rmlA*, *rmlB*, *rmlC* and *rmlD*), in KL-105 the *gnd-ugd* region is only  
283 composed of operon *manCB* (Figure 3) (Pan et al., 2015; Wyres et al., 2015; Wyres et al.,  
284 2016). Interestingly, dTDP-L-rhamnose is the precursor of L-rhamnose, a saccharide required  
285 for the virulence of some pathogenic bacteria, being essential for resistance to serum killing  
286 and for colonization (Giraud et al., 2000).

287 To investigate the hypermucoviscosity phenotype, all the isolates were subjected to  
288 the string test. Among the 19 KPC-2 and/or CTX-M-15 producers, only one CTX-M-15-  
289 producing *K. pneumoniae* ST340/KL-151 strain (FA64), isolated from a healthy chicken  
290 sample, in Brazil, showed hypermucoviscosity. However, neither of the known  
291 hypermucoviscosity encoding genes (*rmpA* or *rmpA2*) were detected in its genome.

292

### 293 ***In vivo* virulence behavior of *K. pneumoniae* CG258**

294 Using the *G. mellonella* virulence model, ST11 CR-KP strains ( $n= 2$ , KL-64/*ybt*+/*clb*+;  $n=2$ ,  
295 KL-105/*ybt*+) killed 100% of wax moth larvae inoculated with  $1 \times 10^6$  colony-forming units of

296 the bacterial specimens, within 96 h, in a similar way to the known hypermucoviscous hvKp  
297 K1/ST23 strain which is *ybt*- and *clb*-negative and carries the pLVPK-like plasmid ( $P >$   
298 0.9999) (Figure 4A). KPC-2- and/or CTX-M-15-producing *K. pneumoniae* strains belonging  
299 to ST340 killed >60% of wax moth larvae ( $n=2$ , KL-15/*ybt*+;  $n=3$ , KL-15/*ybt*-;  $n=1$ , KL-  
300 151/*ybt*-). One ST340 KL-15/*ybt*+ strain isolated from a human infection killed 100% of *G.*  
301 *mellonella* (Figure 4B). *K. pneumoniae* belonging to ST437 ( $n=3$  strains, all KL-36/*ybt*-/*clb*-)  
302 killed ~50% of *G. mellonella*, compared to *K. pneumoniae* ATCC 13883 control (Figure 4D).

303 Overall, among 14 *K. pneumoniae* strains evaluated, 4/6 (83%) *ybt*+ isolates (4/4  
304 ST11, 1/2 ST340) killed all wax moth larvae within 96 h, compared to only 1/8 (13%) *ybt*-  
305 strains (1/1 ST258, 0/4 ST340, 0/3 ST437) ( $P = 0.03$ , Fisher's exact test), suggesting that in  
306 the absence of pLVPK-like plasmids, the presence of *ybt* could be enough to confer enhanced  
307 virulence. However, the single ST258 strain (*ybt*- and *clb*-negative), isolated from a human  
308 clinical sample also killed 100% of *G. mellonella* within 96 h (Figure 4C), suggesting that  
309 other factors, not elucidated in this study, may also be contributing to the virulence phenotype  
310 of CG258 (Araújo et al., 2018; Hennequin and Robin, 2016; Shah et al., 2017; Fu et al., 2018;  
311 Marcoleta et al., 2018; Zheng et al., 2018).

312

## 313 DISCUSSION

314 In South American countries, antimicrobial resistance has long been documented to be more  
315 challenging than in developed ones (Gales et al., 2012; Sampaio and Gales, 2016). In this  
316 regard, the high prevalence of carbapenem resistance in this region has occurred primarily by  
317 the dissemination of KPC-producing *K. pneumoniae* isolates belonging to CG258, which  
318 have been identified beyond the hospital setting, constituting a One Health problem (Andrade  
319 et al., 2011; Gomez et al., 2011; Cejas et al., 2012; Oliveira et al., 2014; Barria-Loaiza et al.,  
320 2016; Rojas et al., 2017; Horna et al., 2017; Nascimento et al., 2017). In this study, we  
321 performed a resistome and virulome analysis of KPC-and/or CTX-M-producing *K.*

322 *pneumoniae* lineages belonging to CG258, circulating in hospital settings. Additionally,  
323 environmental and animal *K. pneumoniae* isolates, recovered in Brazil, were also  
324 investigated.

325 Genome analysis revealed a wider resistome, which includes genetic determinants  
326 conferring resistance to human and animal antibiotics, QACs and HMs, supporting  
327 persistence and adaptation of CG258 to different hosts and anthropogenically affected  
328 environments. Among MDR and PDR lineages, the presence of mutations in *mgrB/pmrB*  
329 genes and in the quinolone resistance-determining region; as well as acquisition of 16s rRNA  
330 methylases- and  $\beta$ -lactamases-encoding genes (including *bla*<sub>ESBL</sub> and *bla*<sub>KPC-2</sub>) have  
331 contributed with resistance to polymyxins, fluoroquinolones, aminoglycosides and broad-  
332 spectrum  $\beta$ -lactam antibiotics. Moreover, we have identified, for the first time, the presence  
333 of the narrow-spectrum  $\beta$ -lactamase encoding gene *bla*<sub>LAP-2</sub> (GenBank accession number  
334 EU159120) and *bla*<sub>TEM-55</sub> ESBL gene (GenBank accession number DQ286729) in *K.*  
335 *pneumoniae* strains ST340 recovered from swine and human hosts, respectively, in Brazil,  
336 confirming versatility of this lineage to acquire novel genetic determinants of resistance.

337 We have identified regional *bla*<sub>KPC</sub> spread consistent with high prevalence of IncN  
338 plasmids, previously associated with the global spread of these genes (Stoesser et al., 2017).  
339 On the other hand, the wide diversity of Inc-type plasmids, found in this study, including  
340 small mobilizable Col-like replicons could be associated with the acquisition of multiple  
341 resistance mechanisms, contributing to the wider resistome. Therefore, the presence of *K.*  
342 *pneumoniae* in a wide range of environmental reservoirs and hosts, with plasmids that have  
343 been shown to facilitate the dissemination of successful resistance genes, even in the absence  
344 of selection pressures, may represent a difficult situation to control (Stoesser et al., 2017).  
345 Another important issue is the identification of IncHI1-type plasmids, which have been  
346 associated with the dissemination of *mcr-1* and *bla*<sub>CTX-M</sub>-type genes in Colombia and  
347 Uruguay, respectively (Saavedra et al., 2017; Garcia-Fulgueiras et al., 2017).

348 Hypervirulent *K. pneumoniae* strains have been sporadically reported in Argentina  
349 and Brazil, being associated with remarkable mortality and the production of a  
350 hypermucoviscous phenotype in lineages belonging to ST23 with capsular serotype K1, and  
351 ST29/K19 (Cejás et al., 2014; Coutinho et al., 2014, Moura et al., 2017). In this study,  
352 virulome analysis revealed that *ybt* and *clb* genes have been acquired by strains of CG258 in  
353 South America, highlighting the need to also consider these additional virulence factors  
354 rather than the presence of pLVPK-like plasmids and hypermucoviscous phenotypes alone, in  
355 the establishment of hypervirulence in carbapenem-resistant lineages of *K. pneumoniae*.

356 Notably, there have been increasing reports of highly virulent *K. pneumoniae* strains  
357 carrying *ybt* belonging to the international clone ST11. The emergence of CR-hvKp strains  
358 carrying *ybt* plus a deletion variant of the pLVPK-like plasmid belonging to ST11 has been  
359 associated with outbreak of fatal nosocomial infection in China (Gu et al., 2018), raising an  
360 epidemiological alert in response to the increased number of cases reported, in the last year  
361 (Lee et al., 2017; Zhan et al., 2017; Chen and Kreiswirth, 2018; Du et al., 2018; Wong et al.,  
362 2018; Yao et al., 2018).

363 In summary, these results (available for interactive exploration in Microreact at  
364 <https://microreact.org/project/H1LSZsRz7>) confirm the enhanced virulence of KPC-2- and/or  
365 CTX-M-producing *K. pneumoniae* belonging to the international high-risk clone CG258 in  
366 South America, where acquisition of ICEKp encoding yersiniabactin and colibactin, and  
367 wider resistome have likely contributed to enhanced virulence and persistence of ST11 (KL-  
368 64 and KL-105) and ST340 (KL-15) lineages, in the human-environment interface. While  
369 capsule composition deserves further investigation, active surveillance should not only focus  
370 on clonal origin, antimicrobial resistance and presence of pLVPK-like plasmids, but also the  
371 virulence associated with yersiniabactin and colibactin, as well as other biomarkers for  
372 differentiation of hvKp from classical *K. pneumoniae* (Russo et al., 2018); and control  
373 measures should be conducted to prevent the global dissemination of these lineages.

374 **CONCLUSION**

375 Our study points out several important issues. Firstly, interplay of yersiniabactin and/or  
376 colibactin and KPC-2 production has become to be identified among *K. pneumoniae*  
377 belonging to CG258, in South America, contributing to the emergence of highly virulent  
378 lineages that pose great risk to human health (Lam et al. 2018a). Second, in South America  
379 ICEKp3, ICEKp4 and ICEKp10 carrying *ybt* and/or *clb* circulate among KPC-2-producing *K.*  
380 *Pneumoniae* belonging to ST11 (KL-64 and KL-105), where multiple distinct K-loci often  
381 indicates distinct sublineages that may correlate with independent ICEKp acquisitions  
382 (supported by our phylogenetic analysis shown in Figure 1); being associated with enhanced  
383 virulence, these should be considered a target for genomic surveillance along with  
384 antimicrobial resistance determinants. Third, the wide resistome could be contributing to  
385 adaptation of KPC-2- and/or CTX-M-producing *K. pneumoniae* CG258 in the human-animal-  
386 environment interface, highlighting the urgent need for enhanced control efforts. Finally,  
387 these findings could contribute to the development of strategies for prevention, diagnosis and  
388 treatment of *K. pneumoniae* infections.

389

390 **ACKNOWLEDGEMENTS**

391 Fundação de Amparo à Pesquisa do Estado de São Paulo (FAPESP2016/08593-9) and  
392 Conselho Nacional de Desenvolvimento Científico (CNPq462042/2014-6) research grants are  
393 gratefully acknowledged. L.C. and N.L. are research grant fellows of FAPESP (2015/21325-  
394 0) and CNPq (312249/2017-9), respectively. K.E.H. is supported by a Senior Medical  
395 Research Fellowship from the Viertel Foundation of Australia. We thank Cefar Diagnóstica  
396 Ltda. (Brazil) for kindly supplying antibiotic discs for susceptibility testing, the Australian  
397 Genome Research Facility (AGRF) for PromethION sequencing, and Drs Marcia M. Morais,  
398 Ana C. Gales, Andrea M. Moreno, Ketrin Silva and Mara Nogueira for kindly provide *K.*  
399 *pneumoniae* strains and/or fastq files.



## 400 REFERENCES

- 401 Andrade LN, Curiao T, Ferreira JC, Longo JM, Clímaco EC et al. Dissemination of *bla*<sub>KPC-2</sub> by the spread of  
402 *Klebsiella pneumoniae* clonal complex 258 clones (ST258, ST11, ST437) and plasmids (IncFII, IncN,  
403 IncL/M) among Enterobacteriaceae species in Brazil. *Antimicrob Agents Chemother* 2011;55:3579-3583.  
404 doi: 10.1128/AAC.01783-10.
- 405 Andrade LN, Novais Â, Stegani LMM, Ferreira JC, Rodrigues C et al. Virulence genes, capsular and plasmid  
406 types of multidrug-resistant CTX-M (-2, -8, -15) and KPC-2-producing *Klebsiella pneumoniae* isolates from  
407 four major hospitals in Brazil. *Diagn Microbiol Infect Dis* 2018;18:30012-30019. doi:  
408 10.1016/j.diagmicrobio.2018.01.007.
- 409 Andrade LN, Vitali L, Gaspar GG, Bellissimo-Rodrigues F, Martinez R et al. Expansion and evolution of a  
410 virulent, extensively drug-resistant (polymyxins B-resistant), QnrS1-, CTX-M-2-, and KPC-2-producing  
411 *Klebsiella pneumoniae* ST11 international high-risk clone. *J Clin Microbiol* 2014;52:2530-2535.  
412 doi:10.1128/JCM.00088-14.
- 413 Araújo BF, Ferreira ML, Campos PA, Royer S, Gonçalves IR et al. Hypervirulence and biofilm production in  
414 KPC-2-producing *Klebsiella pneumoniae* CG258 isolated in Brazil. *J Med Microbiol* 2018;67:523-528. doi:  
415 10.1099/jmm.0.000711.
- 416 Arivett BA, Ream DC, Fiester SE, Mende K, Murray CK et al. Draft genome sequences of *Klebsiella*  
417 *pneumoniae* clinical type strain ATCC 13883 and three multidrug-resistant clinical isolates. *Genome*  
418 *Announcements* 2015;3:e01385-14. doi.org/10.1128/genomeA.01385-14.
- 419 Barria-Loaiza C, Pincheira A, Quezada M, Vera A, Valenzuela P et al. Molecular typing and genetic  
420 environment of the *bla*<sub>KPC</sub> gene in Chilean isolates of *Klebsiella pneumoniae*. *J Glob Antimicrob Resist*  
421 2016;4:28-34. doi: 10.1016/j.jgar.2016.01.001.
- 422 Bowers JR, Kitchel B, Driebe EM, MacCannell DR, Roe C et al. Genomic Analysis of the Emergence and  
423 Rapid Global Dissemination of the Clonal Group 258 *Klebsiella pneumoniae* Pandemic. *PLoS One*  
424 2015;10:e0133727. doi: 10.1371/journal.pone.0133727.
- 425 Brisse S, Issenhuth-Jeanjean S, Grimont PA. Molecular serotyping of *Klebsiella* species isolates by restriction of  
426 the amplified capsular antigen gene cluster. *J Clin Microbiol* 2004;42:3388-98.
- 427 Bueno, M.F., Francisco, G.R., O'Hara, J.A., de Oliveira Garcia, D., Doi, Y. Coproduction of 16S rRNA  
428 methyltransferase RmtD or RmtG with KPC-2 and CTX-M group extended-spectrum  $\beta$ -lactamases in  
429 *Klebsiella pneumoniae*. *Antimicrob Agents Chemother* 2013;57, 2397-2400. doi: 10.1128/AAC.02108-12

- 430 Bushell SR, Mainprize IL, Wear MA, Lou H, Whitfield C et al. Wzi is an outer membrane lectin that underpins  
431 group 1 capsule assembly in *Escherichia coli*. *Structure* 2013;21:844-853. doi: 10.1016/j.str.2013.03.010.
- 432 Carattoli A, Zankari E, García-Fernández A, Voldby Larsen M, Lund O, et al. *In silico* detection and typing of  
433 plasmids using PlasmidFinder and plasmid multilocus sequence typing. *Antimicrob Agents Chemother*  
434 2014;58:3895-3903. doi: 10.1128/AAC.02412-14.
- 435 Catalán-Nájera JC, Garza-Ramos U, Barrios-Camacho H. Hypervirulence and hypermucoviscosity: Two  
436 different but complementary *Klebsiella* spp. phenotypes? *Virulence* 2017;8:1111-1123. doi:  
437 10.1080/21505594.2017.1317412.
- 438 Cejas D, Fernandez Canigia L, Nastro M, Rodríguez C, Tanco A et al. Hyperendemic clone of KPC producing  
439 *Klebsiella pneumoniae* ST 258 in Buenos Aires hospitals. *Infect Genet Evol* 2012;12:499-501. doi:  
440 10.1016/j.meegid.2011.09.018.
- 441 Cejas D, Fernández Canigia L, Rincón Cruz G, Elena AX, Maldonado I et al. First isolate of KPC-2-producing  
442 *Klebsiella pneumoniae* sequence type 23 from the Americas. *J Clin Microbiol* 2014;52:3483-3485. doi:  
443 10.1128/JCM.00726-14.
- 444 Cerdeira L, Silva KC, Fernandes MR, Ienne S, de Souza TA et al. Draft genome sequence of a CTX-M-15-  
445 producing *Klebsiella pneumoniae* sequence type 340 (clonal complex 258) isolate from a food-producing  
446 animal. *J Glob Antimicrob Resist* 2016a;7:67-68. doi: 10.1016/j.jgar.2016.07.012.
- 447 Cerdeira L, Fernandes MR, Francisco GR, Bueno MF, Ienne S et al. Draft genome sequence of a hospital-  
448 associated clone of *Klebsiella pneumoniae* ST340/CC258 coproducing RmtG and KPC-2 isolated from a  
449 pediatric patient. *Genome Announc* 2016b;4:e01130-16. doi: 10.1128/genomeA.01130-16.
- 450 Cerdeira L, Fernandes MR, Ienne S, Souza TA, de O Garcia D et al. Draft genome sequence of an  
451 environmental multidrug-resistant *Klebsiella pneumoniae* ST340/CC258 harbouring *bla*<sub>CTX-M-15</sub> and *bla*<sub>KPC-2</sub>  
452 genes. *J Glob Antimicrob Resist* 2017;8:108-109. doi: 10.1016/j.jgar.2016.12.001
- 453 Chen L, Mathema B, Chavda KD, DeLeo FR, Bonomo RA et al. Carbapenemase-producing *Klebsiella*  
454 *pneumoniae*: molecular and genetic decoding. *Trends Microbiol* 2014;22:686-696. doi:  
455 10.1016/j.tim.2014.09.003.
- 456 Chen L, Kreiswirth BN. Convergence of carbapenem-resistance and hypervirulence in *Klebsiella pneumoniae*.  
457 *Lancet Infect Dis* 2018;18:2-3. doi: 10.1016/S1473-3099(17)30517-0.
- 458 Chen YT, Chang HY, Lai YC, Pan CC, Tsai SF et al. Sequencing and analysis of the large virulence plasmid  
459 pLVPK of *Klebsiella pneumoniae* CG43. *Gene* 2004;337:189-98. doi.org/10.1016/j.gene.2004.05.008.

- 460 Cheng VC, Wong SC, Ho PL, Yuen KY. Strategic measures for the control of surging antimicrobial resistance  
461 in Hong Kong and mainland of China. *Emerg Microbes Infect* 2015;4:e8. doi: 10.1038/emi.2015.8.
- 462 Cifuentes M, García P, San Martín P, Silva F, Zúñiga J et al. First isolation of KPC in Chile: from Italy to a  
463 public hospital in Santiago. *Rev Chilena Infectol* 2012;29:224-228. doi: 10.4067/S0716-  
464 10182012000200018.
- 465 CLSI. Performance Standards for Antimicrobial Antimicrobial Disk and Dilution Susceptibility Tests for  
466 Bacteria Isolated From Animals ed. Informational Supplement. CLSI supplement VET01-S2. Clinical and  
467 Laboratory Standards Institute, Wayne, PA, 2015
- 468 CLSI. Performance Standards for Antimicrobial Susceptibility Testing: 27<sup>th</sup> ed. Informational Supplement.  
469 CLSI supplement M100-S27. Clinical and Laboratory Standards Institute, Wayne, PA, 2017.
- 470 Cortés G, Borrell N, de Astorza B, Gómez C, Sauleda J. Molecular analysis of the contribution of the capsular  
471 polysaccharide and the lipopolysaccharide O side chain to the virulence of *Klebsiella pneumoniae* in a  
472 murine model of pneumonia. *Infect Immun* 2002;70:2583-2590. doi: 10.1128/IAI.70.5.2583-2590.2002.
- 473 Coutinho RL, Visconde MF, Descio FJ, Nicoletti AG, Pinto FC et al. Community-acquired invasive liver abscess  
474 syndrome caused by a K1 serotype *Klebsiella pneumoniae* isolate in Brazil: a case report of hypervirulent  
475 ST23. *Mem Inst Oswaldo Cruz* 2014;109:970-971. doi.org/10.1590/0074-0276140196.
- 476 Croucher NJ, Page AJ, Connor TR, Delaney AJ, Keane JA et al. Rapid phylogenetic analysis of large samples of  
477 recombinant bacterial whole genome sequences using Gubbins. *Nucleic Acids Res* 2015;43:e15. doi:  
478 10.1093/nar/gku1196.
- 479 Diago-Navarro E, Chen L, Passet V, Burack S, Ulacia-Hernando A, et al. Carbapenem-resistant *Klebsiella*  
480 *pneumoniae* exhibit variability in capsular polysaccharide and capsule associated virulence traits. *J Infect*  
481 *Dis* 2014;210:803-813. doi:10.1093/infdis/jiu157.
- 482 Dong N, Zhang R, Liu L, Li R, Lin D et al. Genome analysis of clinical multilocus sequence Type 11 *Klebsiella*  
483 *pneumoniae* from China. *Microb Genom* 2018a; doi: 10.1099/mgen.0.000149.
- 484 Dong N, Yang X, Zhang R, Chan EW, Chen S. Tracking microevolution events among ST11 carbapenemase-  
485 producing hypervirulent *Klebsiella pneumoniae* outbreak strains. *Emerg Microbes Infect* 2018b;7:146.
- 486 Draenert R, Seybold U, Grütznert E, Bogner JR. Novel antibiotics: are we still in the pre-post-antibiotic era?  
487 *Infection* 2015;43:145-151. doi: 10.1007/s15010-015-0749-y.
- 488 Du P, Zhang Y, Chen C. Emergence of carbapenem-resistant hypervirulent *Klebsiella pneumoniae*. *Lancet*  
489 *Infect Dis* 2017;S1473-3099, 30625-30634. doi: 10.1016/S1473-3099(17)30625-4.
- 490 European committee on antimicrobial susceptibility testing. Breakpoint tables for interpretation of MICs and

- 491 zone diameters, v. 6, 2017.([http://www.eucast.org/clinical\\_breakpoints/](http://www.eucast.org/clinical_breakpoints/))
- 492 Falco A, Ramos Y, Franco E, Guzmán A, Takiff H. A cluster of KPC-2 and VIM-2-producing *Klebsiella*  
493 *pneumoniae* ST833 isolates from the pediatric service of a Venezuelan Hospital. *BMC Infect Dis*  
494 2016;16:595. doi: 10.1186/s12879-016-1927-y.
- 495 Follador R, Heinz E, Wyres KL, Ellington MJ, Kowarik M et al. The diversity of *Klebsiella pneumoniae* surface  
496 polysaccharides. *Microb Genom* 2016;2:e000073. doi: 10.1099/mgen.0.000073.
- 497 Fu L, Huang M, Zhang X, Yang X, Liu Y et al. Frequency of virulence factors in high biofilm formation *bla*<sub>KPC</sub>-  
498 <sub>2</sub> producing *Klebsiella pneumoniae* strains from hospitals. *Microb Pathog* 2018;116:168-172. doi:  
499 10.1016/j.micpath.2018.01.030.
- 500 Gales AC, Castanheira M, Jones RN, Sader HS. Antimicrobial resistance among Gram-negative bacilli isolated  
501 from Latin America: results from SENTRY Antimicrobial Surveillance Program (Latin America, 2008-  
502 2010). *Diagn Microbiol Infect Dis* 2012;73:354-360. doi: 10.1016/j.diagmicrobio.2012.04.007.
- 503 Garcia-Fulgueiras V, Araujo L, Bado I, Cordeiro NF, Mota MI et al. Allodemic distribution of plasmids co-  
504 harbouring *bla*(CTX-M-15)/*aac*(6)-Ib-cr/*qnrB* in *Klebsiella pneumoniae* is the main source of extended-  
505 spectrum  $\beta$ -lactamases in Uruguay's paediatric hospital. *J Glob Antimicrob Resist* 2017;9:68-73. doi:  
506 10.1016/j.jgar.2017.01.008.
- 507 Giraud MF, Leonard GA, Field RA, Berlind C, Naismith JH. RmlC, the third enzyme of dTDP-L-rhamnose  
508 pathway, is a new class of epimerase. *Nat Struct Biol* 2000;7:398-402. doi: 10.1038/75178.
- 509 Gomez SA, Pasteran FG, Faccone D, Tijet N, Rapoport M et al. Clonal dissemination of *Klebsiella pneumoniae*  
510 ST258 harbouring KPC-2 in Argentina. *Clin Microbiol Infect* 2011;17:1520-1524. doi: 10.1111/j.1469-  
511 0691.2011.03600.x.
- 512 Gomez SA, Rapoport M, Piergrossi N, Faccone D, Pasteran F et al. Performance of a PCR assay for the rapid  
513 identification of the *Klebsiella pneumoniae* ST258 epidemic clone in Latin American clinical isolates. *Infect*  
514 *Genet Evol* 2016;44:145-146. doi: 10.1016/j.meegid.2016.06.018.
- 515 Gomez-Simmonds A, Uhlemann AC. Clinical implications of genomic adaptation and evolution of carbapenem-  
516 resistant *Klebsiella pneumoniae*. *J Infect Dis* 2017;215:S18-S27. doi: 10.1093/infdis/jiw378.
- 517 Gupta SK, Padmanabhan BR, Diene SM, Lopez-Rojas R, Kempf M et al. ARG-ANNOT, a new bioinformatic  
518 tool to discover antibiotic resistance genes in bacterial genomes. *Antimicrob Agents Chemother* 2014;58:212-  
519 20. doi:10.1128/AAC.01310-13.
- 520 Hennequin C, Robin F. Correlation between antimicrobial resistance and virulence in *Klebsiella pneumoniae*.  
521 *Eur J Clin Microbiol Infect Dis* 2016;35:333-341. doi: 10.1007/s10096-015-2559-7.

- 522 Holt KE, Wertheim H, Zadoks RN, Baker S, Whitehouse CA et al. Genomic analysis of diversity, population  
523 structure, virulence, and antimicrobial resistance in *Klebsiella pneumoniae*, an urgent threat to public health.  
524 *Proc Natl Acad Sci U S A* 2015;112:E3574-E3581. doi: 10.1073/pnas.1501049112.
- 525 Horna G, Velasquez J, Fernández N, Tamariz J, Ruiz J. Characterisation of the first KPC-2-producing *Klebsiella*  
526 *pneumoniae* ST340 from Peru. *J Glob Antimicrob Resist* 2017;9:36-40. doi: 10.1016/j.jgar.2016.12.011.
- 527 Insua JL, Llobet E, Moranta D, Pérez-Gutiérrez C, Tomás A et al. Modeling *Klebsiella pneumoniae*  
528 pathogenesis by infection of the wax moth *Galleria mellonella*. *Infect Immun* 2013;81:3552-3565.  
529 doi:10.1128/IAI.00391-13.
- 530 Junqueira JC. *Galleria mellonella* as a model host for human pathogens: recent studies and new perspectives.  
531 *Virulence* 2012;3:474-476. doi: 10.4161/viru.22493.
- 532 Lam MMC, Wick RR, Wyres KL, Gorrie CL, Judd LM, et al. Genetic diversity, mobilization and spread of the  
533 yersiniabactin-encoding mobile element ICEKp in *Klebsiella pneumoniae* populations. *Microb Genom*  
534 2018a. doi: 10.1099/mgen.0.000196.
- 535 Lam MMC, Wyres KL, Duchêne S, Wick RR, Judd LM et al. Population genomics of hypervirulent *Klebsiella*  
536 *pneumoniae* clonal-group 23 reveals early emergence and rapid global dissemination. *Nature Commun*  
537 2018b;9:2703. doi: 10.1038/s41467-018-05114-7.
- 538 Lee CR, Lee JH, Park KS, Jeon JH, Kim YB et al. Antimicrobial Resistance of Hypervirulent *Klebsiella*  
539 *pneumoniae*: epidemiology, hypervirulence-associated determinants, and resistance mechanisms. *Front Cell*  
540 *Infect Microbiol* 2017;7:483. doi: 10.3389/fcimb.2017.00483.
- 541 Lin TL, Lee CZ, Hsieh PF, Tsai SF, Wang JT. Characterization of integrative and conjugative element ICEKp1-  
542 associated genomic heterogeneity in a *Klebsiella pneumoniae* strain isolated from a primary liver abscess. *J*  
543 *Bacteriol* 2008;190:515–526. doi: 10.1128/JB.01219-07.
- 544 Liu Y, Liu PP, Wang LH, Wei DD, Wan LG et al. Capsular polysaccharide types and virulence-related traits of  
545 epidemic KPC-Producing *Klebsiella pneumoniae* Isolates in a Chinese University Hospital. *Microb Drug*  
546 *Resist* 2017;23:901-907. doi: 10.1089/mdr.2016.0222.
- 547 Magiorakos AP, Srinivasan A, Carey RB, Carmeli Y, Falagas ME et al. Multidrug-resistant, extensively drug-  
548 resistant and pandrug-resistant bacteria: an international expert proposal for interim standard definitions for  
549 acquired resistance. *Clin Microbiol Infect* 2012;18:268-281. doi: 10.1111/j.1469-0691.2011.03570.x.
- 550 Marcoleta AE, Berríos-Pastén C, Nuñez G, Monasterio O, Lagos R. *Klebsiella pneumoniae* Asparagine tDNAs  
551 are integration hotspots for different genomic islands encoding microcin e492 production determinants and

- 552 other putative virulence factors present in hypervirulent strains. *Front Microbiol* 2016;7:849. doi:  
553 10.3389/fmicb.2016.00849.
- 554 Marcoleta AE, Varas MA, Ortiz-Severín J, Vásquez L, Berríos-Pastén C et al. Evaluating different virulence  
555 traits of *Klebsiella pneumoniae* using Dictyosteliumdiscoideum and Zebrafish larvae as host  
556 models. *FrontCell Infect Microbiol* 2018;8:30. doi: 10.3389/fcimb.2018.00030.
- 557 Marquez C, Ingold A, Echeverría N, Acevedo A, Vignoli R et al. Emergence of KPC-producing *Klebsiella*  
558 *pneumoniae* in Uruguay: infection control and molecular characterization. *New Microbes New Infect*  
559 2014;2:58-63. doi: 10.1002/nmi2.40.
- 560 Martin RM, Cao J, Wu W, Zhao L, Manthei DM et al. Identification of pathogenicity-associated loci in  
561 *Klebsiella pneumoniae* from hospitalized patients. *mSystems* 2018;3: e00015-18. doi:  
562 10.1128/mSystems.00015-18.
- 563 Martins WM, Almeida AC, Nicoletti AG, Cayô R, Gales AC et al. Coproduction of KPC-2 and QnrB19 in  
564 *Klebsiella pneumoniae* ST340 isolate in Brazil. *Diagn Microbiol Infect Dis* 2015;83:375-376. doi:  
565 10.1128/mSystems.00015-18.
- 566 Mathers AJ, Peirano G, Pitout JD. The role of epidemic resistance plasmids and international high-risk clones in  
567 the spread of multidrug-resistant Enterobacteriaceae. *Clin Microbiol Rev* 2015;28:565-591.  
568 doi:10.1128/CMR.00116-14.
- 569 Monte DF, Mem A, Fernandes MR, Cerdeira L, Esposito F et al. Chicken meat as a reservoir of colistin-  
570 resistant *Escherichia coli* strains carrying *mcr-I* genes in South America. *Antimicrob Agents Chemother*  
571 2017;61:e02718-16. doi: 10.1128/AAC.02718-16
- 572 Moura Q, Esposito F, Fernandes MR, Espinoza-Muñoz M, Souza TA et al. Genome sequence analysis of a  
573 hypermucoviscous/hypervirulent and MDR CTX-M-15/K19/ST29 *Klebsiella pneumoniae* isolated from  
574 human infection. *Pathog Dis* 2017;29:75. doi: 10.1093/femspd/ftx121.
- 575 Moura Q, Fernandes MR, Silva KC, Monte DF, Esposito F et al. Virulent nontyphoidal *Salmonella* producing  
576 CTX-M and CMY-2  $\beta$ -lactamases from livestock, food and human infection, Brazil. *Virulence* 2018;9:281-  
577 286. doi: 10.1080/21505594.2017.1279779.
- 578 Nascimento T, Cantamessa R, Melo L, Fernandes MR, Fraga E et al. International high-risk clones of *Klebsiella*  
579 *pneumoniae* KPC-2/CC258 and *Escherichia coli* CTX-M-15/CC10 in urban lake waters. *Sci Total Environ*  
580 2017;598:910-915. doi: 10.1016/j.scitotenv.2017.03.207.
- 581 Navon-Venezia S, Kondratyeva K, Carattoli A. *Klebsiella pneumoniae*: a major worldwide source and shuttle  
582 for antibiotic resistance. *FEMS Microbiol Rev* 2017;41:252-275. doi: 10.1093/femsre/fux013.

- 583 Oliveira S, Moura RA, Silva KC, Pavez M, McCulloch JA et al. Isolation of KPC-2-producing *Klebsiella*  
584 *pneumoniae* strains belonging to the high-risk multiresistant clonal complex 11 (ST437 and ST340) in urban  
585 rivers. *J Antimicrob Chemother* 2014;69:849-852. doi: 10.1093/jac/dkt431.
- 586 O'Neill J. Review on Antimicrobial Resistance Antimicrobial Resistance: Tackling a crisis for the health and  
587 wealth of nations. *London: Review on Antimicrobial Resistance* 2014. Available from: [https://amr-](https://amr-review.org/sites/default/files/AMR%20Review%20Paper%20-%20Tackling%20a%20crisis%20for%20the%20health%20and%20wealth%20of%20nations_1.pdf)  
588 [review.org/sites/default/files/AMR%20Review%20Paper%20-](https://amr-review.org/sites/default/files/AMR%20Review%20Paper%20-%20Tackling%20a%20crisis%20for%20the%20health%20and%20wealth%20of%20nations_1.pdf)  
589 [%20Tackling%20a%20crisis%20for%20the%20health%20and%20wealth%20of%20nations\\_1.pdf](https://amr-review.org/sites/default/files/AMR%20Review%20Paper%20-%20Tackling%20a%20crisis%20for%20the%20health%20and%20wealth%20of%20nations_1.pdf)
- 590 Paczosa MK, Meccas J. *Klebsiella pneumoniae*: going on the offense with a strong defense. *Microbiol Mol Biol*  
591 *Rev* 2016;80:629-661. doi: 10.1128/MMBR.00078-15.
- 592 Pan YJ, Lin TL, Chen CT, Chen YY, Hsieh PF et al. Genetic analysis of capsular polysaccharide synthesis gene  
593 clusters in 79 capsular types of *Klebsiella spp.* *Nat Sci Rep* 2015;5:15573.
- 594 Passet V, Brisse S. Association of tellurite resistance with hypervirulent clonal groups of *Klebsiella*  
595 *pneumoniae*. *J Clin Microbiol* 2015;53:1380-2. doi: 10.1128/JCM.03053-14.
- 596 Pavez M, Mamizuka EM, Lincopan N. Early dissemination of KPC-2-producing *Klebsiella pneumoniae* strains  
597 in Brazil. *Antimicrob Agents Chemother* 2009;53:2702. doi: 10.1128/AAC.00089-09.
- 598 Pereira PS, de Araujo CF, Seki LM, Zahner V, Carvalho-Assef AP et al. Update of the molecular epidemiology  
599 of KPC-2-producing *Klebsiella pneumoniae* in Brazil: spread of clonal complex 11 (ST11, ST437 and  
600 ST340). *J Antimicrob Chemother* 2013;68:312-316. doi: 10.1093/jac/dks396.
- 601 Richter CH, Custer B, Steele JA, Wilcox BA, Xu J. Intensified food production and correlated risks to human  
602 health in the Greater Mekong Subregion: a systematic review. *Environ Health* 2015;14:43. doi:  
603 10.1186/s12940-015-0033-8.
- 604 Roca I, Akova M, Baquero F, Carlet J, Cavalieri M et al. The global threat of antimicrobial resistance: science  
605 for intervention. *New Microbes New Infect* 2015;6:22-9. doi: 10.1016/j.nmni.2015.02.007.
- 606 Rojas LJ, Weinstock GM, De La Cadena E, Diaz L, Rios R et al. An analysis of the epidemic of *Klebsiella*  
607 *pneumoniae* carbapenemase-producing *K. pneumoniae*: convergence of two evolutionary mechanisms  
608 creates the "perfect storm". *J Infect Dis* 2017;217:82-92. doi: 10.1093/infdis/jix524.
- 609 Russo TA, Olson R, Fang CT, Stoesser N, Miller M et al. Identification of biomarkers for differentiation of  
610 hypervirulent *Klebsiella pneumoniae* from classical *K. pneumoniae*. *J Clin Microbiol* 2018;56: e00776-18.  
611 10.1128/JCM.00776-18.



- 612 Saavedra SY, Diaz L, Wiesner M, Correa A, Arévalo SA et al. genomic and molecular characterization of  
613 clinical isolates of Enterobacteriaceae harboring *mcr-1* in Colombia, 2002 to 2016. *Antimicrob Agents*  
614 *Chemother* 2017;61:e00841-17. doi: 10.1128/AAC.00841-17.
- 615 Sampaio JL, Gales AC. Antimicrobial resistance in Enterobacteriaceae in Brazil: focus on  $\beta$ -lactams and  
616 polymyxins. *Braz J Microbiol* 2016;1:31-37. doi: 10.1016/j.bjm.2016.10.002.
- 617 Shah RK, Ni ZH, Sun XY, Wang GQ, Li F. The determination and correlation of various virulence genes,  
618 ESBL, serum bactericidal effect and biofilm formation of clinical isolated classical *Klebsiella pneumoniae*  
619 and hypervirulent *Klebsiella pneumoniae* from respiratory tract infected patients. *Pol J Microbiol* 2017;4:01-  
620 508. doi: 10.5604/01.3001.0010.7042.
- 621 Stamatakis A. RAxML-VI-HPC: maximum likelihood-based phylogenetic analyses with thousands of taxa and  
622 mixed models. *Bioinformatics* 2006;22:2688-90.
- 623 Stoesser N, Sheppard AE, Peirano G, Anson LW, Pankhurst L et al. Genomic epidemiology of global *Klebsiella*  
624 *pneumoniae* carbapenemase (KPC)-producing *Escherichia coli*. *Sci Rep* 2017;7:5917. doi: 10.1038/s41598-  
625 017-06256-2.
- 626 Struve C, Roe CC, Stegger M, Stahlhut SG, Hansen DS et al. Mapping the evolution of hypervirulent *Klebsiella*  
627 *pneumoniae*. *MBio* 2015;6:e00630. doi: 10.1128/mBio.00630-15.
- 628 Tang HL, Chiang MK, Liou WJ, Chen YT, Peng HL et al. Correlation between *Klebsiella pneumoniae* carrying  
629 pLVPK-derived loci and abscess formation. *Eur J Clin Microbiol Infect Dis* 2010;29:689-698. doi:  
630 10.1007/s10096-010-0915-1
- 631 Van Boeckel TP, Brower C, Gilbert M, Grenfell BT, Levin SA et al. Global trends in antimicrobial use in food  
632 animals. *Proc Natl Acad Sci U S A* 2015;112:5649-5654. doi: 10.1073/pnas.1503141112.
- 633 Vera-Leiva A, Barria-Loaiza C, Carrasco-Anabalón S, Lima C, Aguayo-Reyes A et al. KPC: *Klebsiella*  
634 *pneumoniae* carbapenemase, main carbapenemase in Enterobacteriaceae. *Rev Chilena Infectol* 2017;34:476-  
635 484. doi: 10.4067/S0716-10182017000500476.
- 636 Villegas MV, Lolans K, Correa A, Suarez CJ, Lopez JA et al. First detection of the plasmid-mediated class a  
637 carbapenemase KPC-2 in clinical isolates of *Klebsiella pneumoniae* from South America. *Antimicrob Agents*  
638 *Chemother* 2006;50:2880-2882. doi: 10.1128/AAC.00186-06.
- 639 Wang X, Xie Y, Li G, Liu J, Li X et al. Whole-Genome-Sequencing characterization of bloodstream infection-  
640 causing hypervirulent *Klebsiella pneumoniae* of capsular serotype K2 and ST374. *Virulence* 2018;9:510-  
641 521. doi: 10.1080/21505594.2017.1421894.

- 642 Wei DD, Wan LG, Deng Q, Liu Y. Emergence of KPC-producing *Klebsiella pneumoniae* hypervirulent clone of  
643 capsular serotype K1 that belongs to sequence type 11 in Mainland China. *Diagn Microbiol Infect Dis*  
644 2016;85:192-194. doi: 10.1016/j.diagmicrobio.2015.03.012.
- 645 Wei ZQ, Du XX, Yu YS, Shen P, Chen YG et al. Plasmid-mediated KPC-2 in a *Klebsiella pneumoniae* isolate  
646 from China. *Antimicrob Agents Chemother* 2007;51:763-5.
- 647 Wick RR, Judd LM, Gorrie CL, Holt KE. Unicycler: Resolving bacterial genome assemblies from short and  
648 long sequencing reads. *PLoS Comput Biol* 2017;13:e1005595. doi: 10.1371/journal.pcbi.1005595.
- 649 Wick RR, Heinz E, Holt KE, Wyres KL. Kaptive web: user-friendly capsule and lipopolysaccharide serotype  
650 prediction for *Klebsiella* Genomes. *J Clin Microbiol* 2018;56: e00197-18. doi: 10.1128/JCM.00197-18.
- 651 Wong MHY, Shum HP, Chen JHK, Man MY, Wu Aet al. Emergence of carbapenem-resistant hypervirulent  
652 *Klebsiella pneumoniae*. *Lancet Infect Dis* 2018;18:24. doi: 10.1016/S1473-3099(17)30629-1.
- 653 Woolhouse M, Ward M, van Bunnik B, Farrar J. Antimicrobial resistance in humans, livestock and the wider  
654 environment. *Philos Trans R Soc Lond B Biol Sci* 2015;370:20140083. doi: 10.1098/rstb.2014.0083.
- 655 Wu H, Li D, Zhou H, Sun Y, Guo L, et al. Bacteremia and other body site infection caused by hypervirulent and  
656 classic *Klebsiella pneumoniae*. *Microb Pathog* 2017;104:254-262. doi: 10.1016/j.micpath.2017.01.049.
- 657 Wu KM, Li LH, Yan JJ, Tsao N, Liao TL et al. Genome sequencing and comparative analysis of *Klebsiella*  
658 *pneumoniae* NTUH-K2044, a strain causing liver abscess and meningitis. *J Bacteriol* 2009;191:4492-4501.  
659 doi: 10.1128/JB.00315-09.
- 660 Wyres KL, Gorrie C, Edwards DJ, Wertheim HF, Hsu LY et al. Extensive capsule locus variation and large-  
661 scale genomic recombination within the *Klebsiella pneumoniae* clonal group 258. *Genome Biol Evol*  
662 2015;7:1267-1279. doi: 10.1093/gbe/evv062.
- 663 Wyres KL, Holt, KE. *Klebsiella pneumoniae* population genomics and antimicrobial-resistant Clones. *Trends*  
664 *Microbiol* 2016;24:944-956. doi:10.1016/j.tim.2016.09.007.
- 665 Yao H, Qin S, Chen S, Shen J, Du XD. Emergence of carbapenem-resistant hypervirulent *Klebsiella*  
666 *pneumoniae*. *Lancet Infect Dis* 2018;18:25. doi: 10.1016/S1473-3099(17)30628-X.
- 667 Zankari E, Hasman H, Cosentino S, Vestergaard M, Rasmussen S et al. Identification of acquired antimicrobial  
668 resistance genes. *J Antimicrob Chemother* 2012;67:2640-2644. doi: 10.1093/jac/dks261.
- 669 Zhan L, Wang S, Guo Y, Jin Y, Duan J et al. Outbreak by hypermucoviscous *Klebsiella pneumoniae* ST11  
670 isolates with carbapenem resistance in a tertiary hospital in China. *Front Cell Infect Microbiol* 2017;7:182.  
671 doi: 10.3389/fcimb.2017.00182.

672 Zheng JX, Lin ZW, Chen C, Chen Z, Lin FJ et al. Biofilm formation in *Klebsiella pneumoniae* bacteremia  
673 strains was found to be associated with CC23 and the presence of *wcaG*. *Front Cell Infect Microbiol*  
674 2018;8:21. doi: 10.3389/fcimb.2018.00021.

675 Zurita J, Alcocer I, Ortega-Paredes D, Barba P, Yauri F et al. Carbapenem-hydrolysing  $\beta$ -lactamase KPC-2 in  
676 *Klebsiella pneumoniae* isolated in Ecuadorian hospitals. *J Glob Antimicrob Resist* 2013;1:229-230. doi:  
677 10.1016/j.jgar.2013.06.001.

678

**Table 1.** Resistance profile of KPC-2- and/or CTX-M-producing *K. pneumoniae* strains belonging to CG258 circulating in South America \*

| Strain | MICs (µg/ml) |     |     |      |     |     |     | Kirby-Bauer                                                |
|--------|--------------|-----|-----|------|-----|-----|-----|------------------------------------------------------------|
|        | POL          | ETP | IMP | MER  | ENO | CIP | LVX |                                                            |
| KP171  | 2            | 8   | 16  | 8    | 8   | 8   | 32  | CTX, CAZ, CPM, CRO, NAL, GEN, SUT, ATM, TET, CLO, FOS      |
| 1194   | 2            | 4   | 8   | 8    | 8   | 8   | 32  | CTX, CAZ, CPM, CRO, NAL, AMI, GEN, SUT, ATM, TET, CLO, FOS |
| 606B   | 2            | 1   | 1   | 0.25 | 4   | 4   | 16  | CTX, CAZ, CPM, CRO, NAL, GEN, SUT, ATM, TET, CLO, FOS      |
| KPN535 | 16           | 4   | 8   | 4    | 8   | 8   | 32  | CTX, CAZ, CPM, CRO, NAL, GEN, SUT, ATM, CLO, FOS           |
| KPC45  | 32           | 4   | 8   | 4    | 4   | 4   | 16  | CTX, CAZ, CPM, CRO, NAL, SUT, ATM                          |
| IBL2.4 | 8            | 4   | 8   | 8    | 4   | 8   | 32  | CTX, CAZ, CPM, CRO, CFO, NAL, ATM, TET                     |
| KP488  | >32          | 4   | 8   | 8    | 4   | 4   | 32  | CTX, CAZ, CPM, CRO, CFO, NAL, GEN, SUT, ATM, CLO, FOS      |
| 196    | 0.25         | >32 | 8   | >32  | 8   | >32 | >32 | CTX, CAZ, CPM, CRO, CFO, NAL, SUT, ATM                     |
| 148    | 32           | >32 | >32 | >32  | 4   | >32 | >32 | CTX, CAZ, CPM, CRO, CFO, NAL, SUT, ATM, TET, CLO, FOS      |
| 314    | 2            | >32 | >32 | >32  | 4   | >32 | >32 | CTX, CAZ, CPM, CRO, CFO, NAL, SUT, ATM, TET                |
| KP411  | 0,5          | >32 | >32 | >32  | 8   | 8   | 8   | CTX, CAZ, CPM, CRO, CFO, NAL, SUT, ATM, TET, CLO           |
| KP337  | 0,5          | >32 | >32 | >32  | 4   | 4   | 8   | CTX, CAZ, CPM, CRO, CFO, NAL, ATM, TET, CLO                |
| KP326  | 0,5          | >32 | 8   | 8    | 8   | 8   | 16  | CTX, CAZ, CPM, CRO, NAL, SUT, ATM, TET, CLO, GEN           |
| KP515  | 0,5          | >32 | >32 | >32  | 8   | 8   | 16  | CTX, CAZ, CPM, CRO, CFO, NAL, SUT, ATM, TET, CLO, FOS      |
| KP870  | 0,5          | >32 | >32 | >32  | 16  | 8   | 16  | CTX, CAZ, CPM, CRO, CFO, NAL, SUT, ATM, TET, CLO, FOS      |
| FA64   | 1            | 1   | 0.5 | 0.5  | 4   | 8   | 4   | CTX, CAZ, CPM, CRO, NAL, SUT, ATM                          |
| 2KP    | 1            | 8   | 8   | 8    | 8   | 8   | 8   | CTX, CAZ, CPM, CRO, CFO, NAL, SUT, ATM, TET                |
| 1ECKPC | 1            | 4   | 8   | 8    | 8   | 8   | 8   | CTX, CAZ, CPM, CRO, CFO, NAL, SUT, ATM, TET, CLO, GEN      |
| N7     | 1            | 8   | 8   | 8    | 4   | 8   | 8   | CTX, CAZ, CPM, CRO, NAL, SUT, ATM, TET, CLO, GEN, AMI      |

\*POL – polymyxin B, ETP – ertapenem, IMP – imipenem, MER- meropenem, ENO – enrofloxacin, CIP – ciprofloxacin, LVX – levofloxacin, CTX – cefotaxime, CAZ – ceftazidime, CPM – ceftipime, CRO – ceftriaxone, CFO – ceftioxin, NAL – nalidixic acid, AMI - amikacin, GEN – gentamicin, SUT – sulfamethoxazole/trimethoprim, ATM - aztreonam, TET – Tetracycline, CLO – chloramphenicol, FOS – fosfomicin.

## Figure legends

**Fig. 1.** Virulome, resistome and plasmid population of KPC- and/or CTX-M-producing *K. pneumoniae* belonging to CG258 in Latin America. Tracks indicate: (1) country, (2) strain source, (3) sequence type (ST), (4) ICEKp structure. The red/black/orange regions represent the presence of the gene, and blank regions represent their absence. Amg, aminoglycosides resistance genes (i.e., transferases and 16S rRNA methylases); Col, polymyxin resistance genes (including *mgrB/pmrB* mutations and *mcr-1*); Flq, fluoroquinolone resistance genes (i.e., QRDR mutations and PMQR); MLS, macrolides resistance genes (*mphA*, *erm*); Phe, phenicols resistance genes (*cat*, *cml*, *flor*) (Table S2).

**Fig. 2.** Comparative analysis of integrative and conjugative elements ICEKp3, ICEKp4, ICEKp10, and ICEKp12. In A, ICEKp mobilizing yersiniabactin identified in *K. pneumoniae* CG258 in South America. In B, alignment of ICEKp10/*ybt* 17 against ICEKp10 carrying a novel yersiniabactin sequence YbST346, identified in lineages belonging to ST11, isolated in Brazil. Blue blocks represent yersiniabactin synthesis locus *ybt*, labelled with the associated *ybt* lineage. Orange represents the mobilization module. Light orange represents KPZM ( $Zn^{2+}/Mn^{2+}$ ) metabolism module. Light blue shading denotes shared regions of homology (>95%), where the main difference between the two ICEKp10 is the presence of a novel *ybt* lineage, and the insertion sequence *ISEc21* (*IS110* family) located inside the  $Zn^{2+}/Mn^{2+}$  metabolism module (KPZM). The key differences between ICEKp3, ICEKp4 and ICEKp12 have been previously defined and are restricted to a single variable region, where ICEKp3 was constituted by restriction endonuclease, DUF4917 domain containing protein, ATP/GTP phosphatase, reverse transcriptase, DDE endonuclease, and five hypothetical proteins; whereas ICEKp4 was formed by transposase, ABC transporter, type I restriction endonuclease, DNA methyltransferase and hypothetical protein; and ICEKp12 contained an additional  $Zn^{2+}/Mn^{2+}$  metabolism module (KPZM) (Marcoleta et al. 2016; Lam et al., 2018a).

**Fig. 3.** K-loci (KL-1, K-L2, KL-105, KL-64 and KL-15) structures of CR-KP lineages belonging to CG258. In *K. pneumoniae*, K-locus includes a set of genes in the terminal regions encoding for the core capsule biosynthesis machinery (i.e., *galF*, *wzi*, *wza*, *wzb*, *wzc*, *gnd* and *ugd*). The central region is highly variable, encoding for specific sugar synthesis of the capsule, processing and export proteins, plus the core assembly components Wzx (flippase) and Wzy (capsule repeat unit polymerase) (Pan et al., 2015; Wyres et al., 2016). Protein coding sequences are represented as arrows colored by predicted function of the protein product and labelled with gene names where known.

**Fig. 4.** *In vivo* virulence behavior of CR-KP belonging to ST11, ST340, ST437 and ST258 in a *Galleria mellonella* infection model. The virulence behavior of  $1 \times 10^6$  colony-forming units of representative *K. pneumoniae* strains on *G. mellonella* survival was assessed using both, non-virulent (ATCC 13883, ST not determined in this study) and hypervirulent (A58300 K1/ST23) *K. pneumoniae* control strains. In A, *K. pneumoniae* KPC45, KP488, IBL2.4 and N7 belonging to ST11, recovered from human and environmental samples. In B, *K. pneumoniae* 1194, KP870, 1ECKPC, 2KP, FA64, KP171 strains belonging to ST340, recovered from human, animal and environmental samples. In C, *K. pneumoniae* KP337 strain belonging to ST258, recovered from a clinical sample. In D, *K. pneumoniae* KP196, KP411 and 314 strains belonging to ST437, recovered from human and environmental samples. Clinical and epidemiological characteristics of *K. pneumoniae* strains are quoted in Table S1. \* $P > 0.9999$ , indicates no statistically significant difference with respect to the hypervirulent A58300 K1/ST23 *K. pneumoniae* control strain.

Figure 1

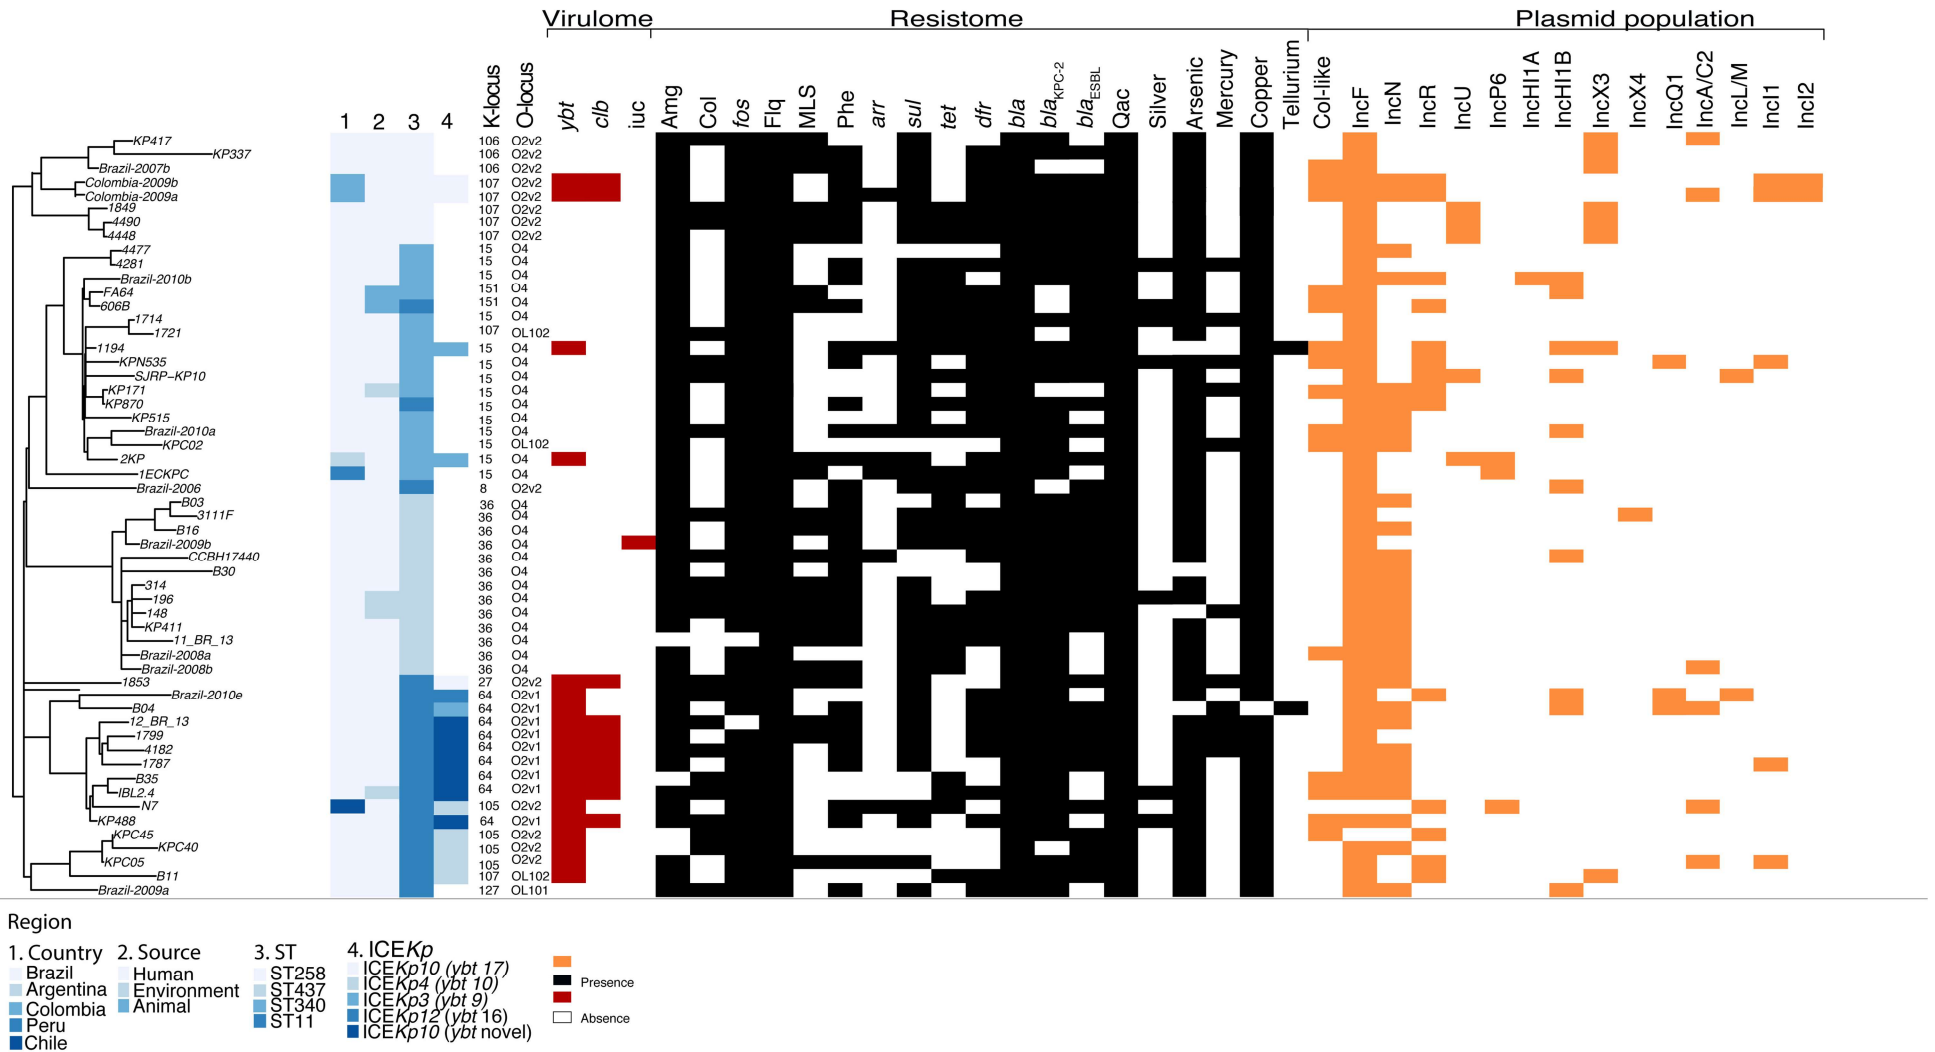



## Figure 2

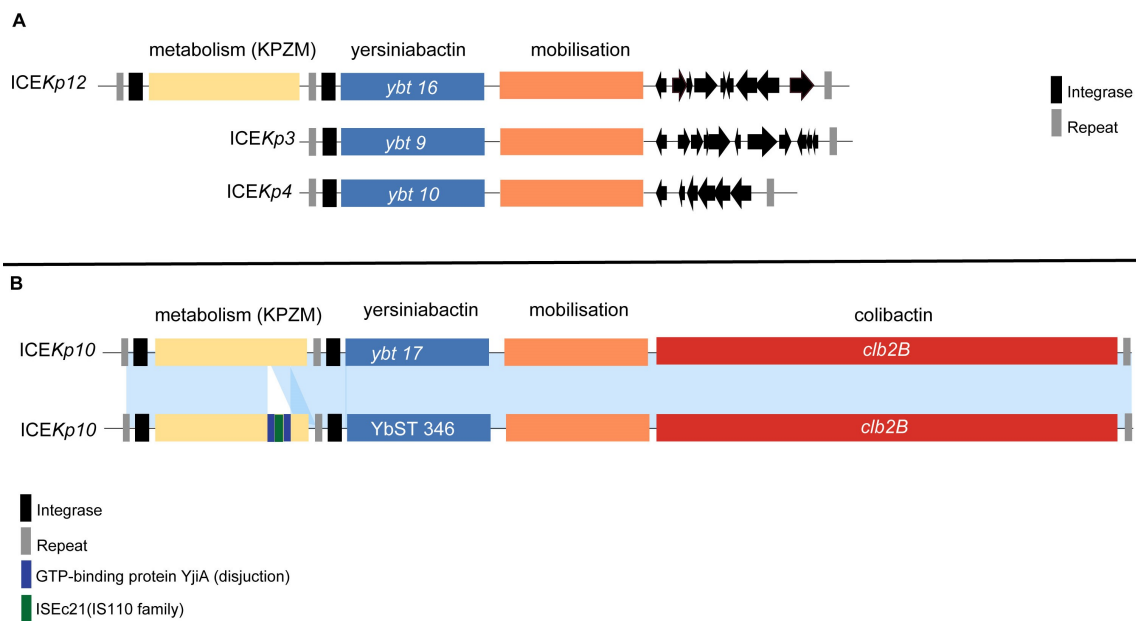

Figure 3

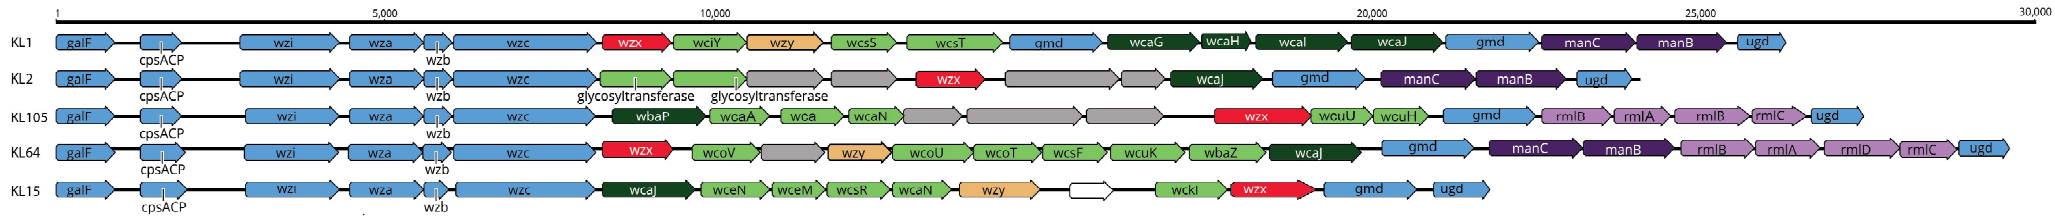

**Figure 4**

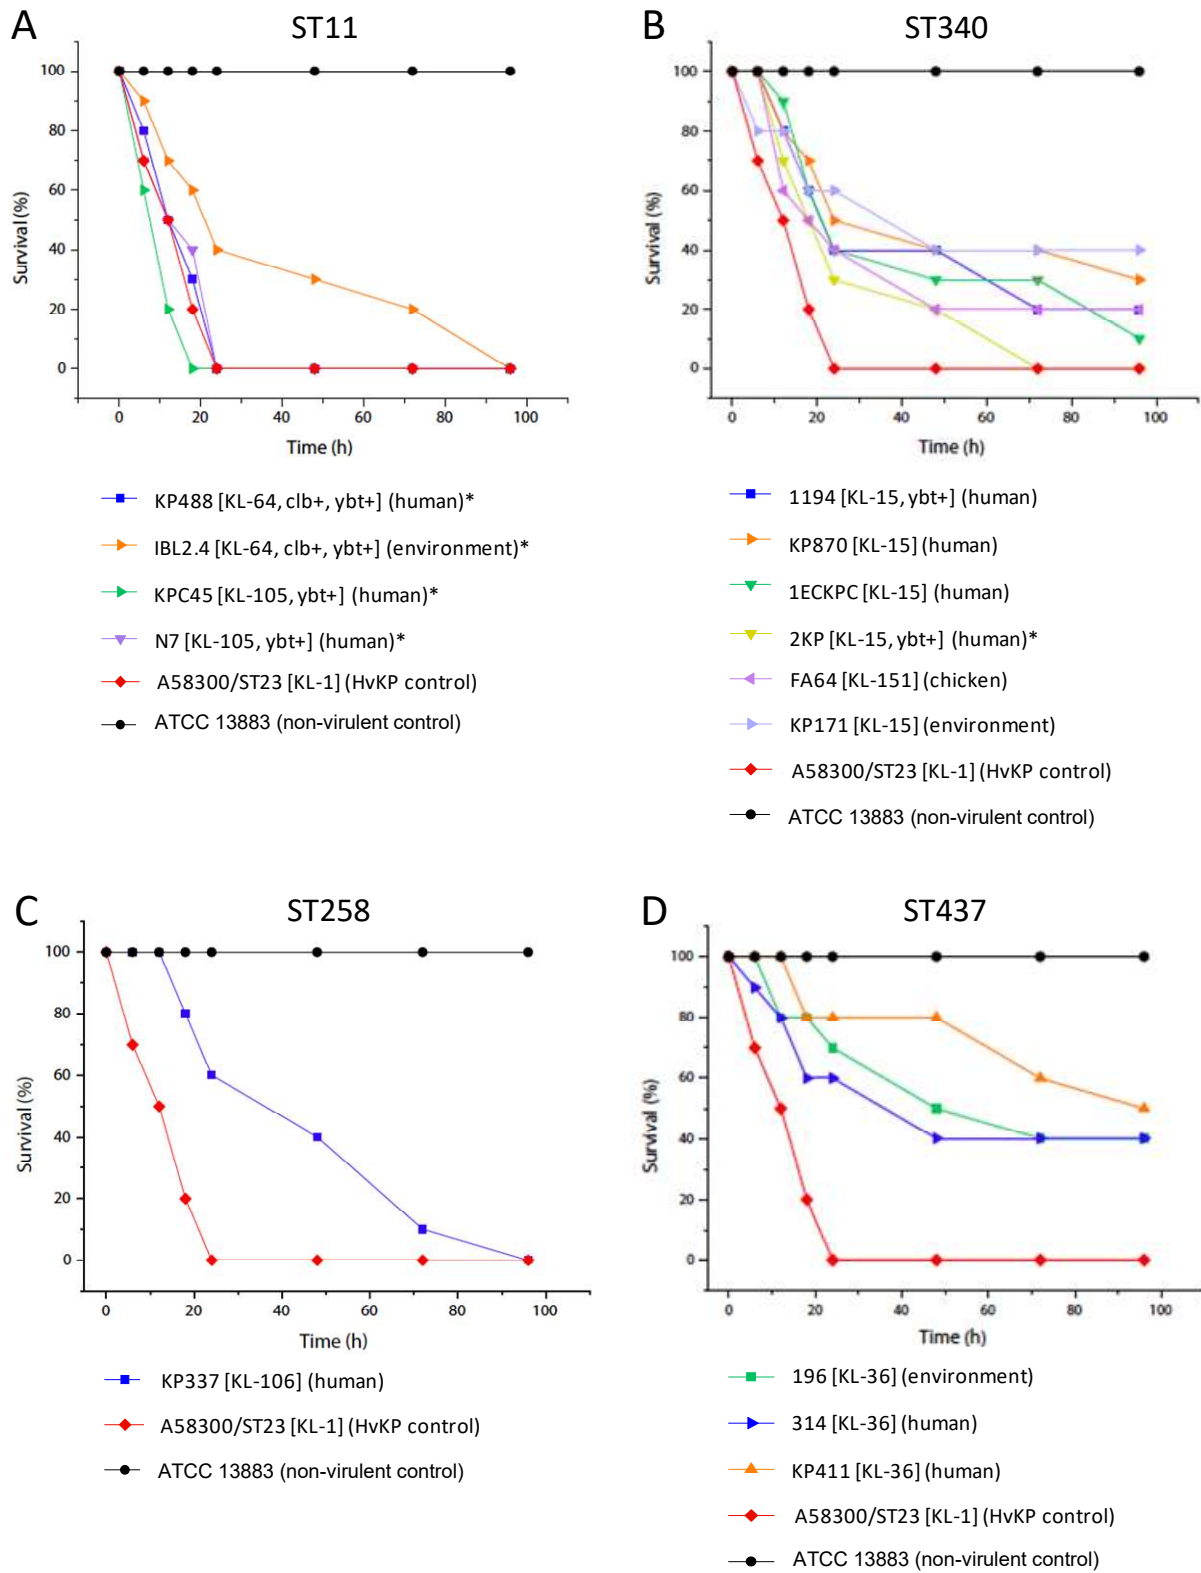

Source: https://www.biorxiv.org/content/10.1101/435750v1.full.pdf
